# Supplementary material for: Discovery of novel BET inhibitors by drug repurposing of nitroxoline and its analogues
Source: Royal Society of Chemistry journal article supplement (doi:10.1039/c7ob02369c), 2017-01-01
Supplement: c7ob02369c1.pdf [file c7ob02369c1.pdf]

## SUPPORTING INFORMATION

# Discovery of Novel BET Inhibitors by Drug Repurposing of Nitroxoline and Its Analogues

Hao Jiang<sup>a,b#</sup>, Jing Xing<sup>a,b#</sup>, Chen Wang<sup>a,b#</sup>, Hao Zhang<sup>a</sup>, Liyan Yue<sup>a</sup>, Xiaozhe Wan<sup>a</sup>, Wei Chen<sup>e</sup>,  
Hong Ding<sup>a</sup>, Yiqian Xie<sup>a</sup>, Hongru Tao<sup>a</sup>, Zhifeng Chen<sup>a</sup>, Hualiang Jiang<sup>a,c,d</sup>, Kaixian Chen<sup>a,c</sup>,  
Shijie Chen<sup>a,d\*</sup>, Mingyue Zheng<sup>a,\*</sup>, Yuanyuan Zhang<sup>a,d\*</sup> and Cheng Luo<sup>a,d</sup>

<sup>a</sup>Drug Discovery and Design Center, State Key Laboratory of Drug Research, Shanghai Institute of Materia Medica, Chinese Academy of Sciences, 555 Zuchongzhi Road, Shanghai 201203, China

<sup>b</sup>University of Chinese Academy of Sciences, 19 Yuquan Road, Beijing 100049, China

<sup>c</sup>School of Life Science and Technology, ShanghaiTech University, 100 Haik Road, Shanghai 201210, China

<sup>d</sup>CAS Key Laboratory of Receptor Research, Shanghai Institute of Materia Medica, Chinese Academy of Sciences, 555 Zuchongzhi Road, Shanghai 201203, China

<sup>e</sup>Department of Urology, Renji Hospital, School of Medicine, Shanghai Jiao Tong University, 160 Pujian Road, Shanghai 200127, China

#These authors contributed equally.

\*Correspondence: Yuanyuan Zhang, E-mail: [zhangyy@simmm.ac.cn](mailto:zhangyy@simmm.ac.cn) or Mingyue Zheng, E-mail: [myzheng@simmm.ac.cn](mailto:myzheng@simmm.ac.cn) or Shijie Chen, E-mail: [shijiechen@simmm.ac.cn](mailto:shijiechen@simmm.ac.cn)

---

## Contents

1. Table S1. Scores, ranking and bioactivity of compounds selected from virtual screening.
2. Figure S1. Dose-response behaviors of cloxyquin.
3. Figure S2. Overlay the complex of BRD4\_BD1-nitroxoline with crystals of other bromodomain-containing proteins.
3. Figure S3. Predicted binding patterns of indacaterol and procaterol, together with nitroxoine for comparison.
4. Table S2. Diffraction data statistics.

**Table S1.** Scores, ranking and bioactivity of compounds selected from virtual screening.

| CAS                     | BRD4LGR Score | BRD4LGR Rank | BRD4LGR LE <sup>a</sup> | Glide Score | Glide Rank | Inhibition% @50μM | Inhibition% @5μM |
|-------------------------|---------------|--------------|-------------------------|-------------|------------|-------------------|------------------|
| 112809-51-5             | 0.97          | 1            | 3.39                    | -6.49       | 66         | 16.66 ± 1.41      | 3.14 ± 1.04      |
| 50-28-2                 | 0.95          | 3            | 3.49                    | -5.88       | 149        | 25.35 ± 3.43      | 9.64 ± 1.13      |
| 100-51-6 <sup>b</sup>   | 0.94          | 5            | 8.66                    | -5.92       | 142        | 20.09 ± 2.92      | 8.62 ± 1.31      |
| 60719-84-8              | 0.86          | 14           | 4.59                    | -7.23       | 11         | 41.53 ± 6.45      | 139.32 ± 3.15    |
| 89-83-8                 | 0.85          | 17           | 5.64                    | -6.56       | 58         | 18.58 ± 3.12      | 7.12 ± 2.75      |
| 130-16-5                | 0.84          | 18           | 4.69                    | -6.79       | 36         | 90.17 ± 2.38      | 36.43 ± 1.57     |
| 482-36-0                | 0.82          | 20           | 1.77                    | -6.84       | 33         | 31.03 ± 5.40      | 5.71 ± 1.70      |
| 124750-99-8             | 0.81          | 21           | 1.93                    | -5.91       | 144        | 24.42 ± 0.93      | 1.54 ± 2.43      |
| 2216-51-5               | 0.80          | 25           | 5.12                    | -6.55       | 60         | 12.76 ± 0.62      | 0.93 ± 1.68      |
| 67227-57-0              | 0.80          | 26           | 2.60                    | -6.66       | 46         | 25.66 ± 5.85      | 9.19 ± 4.21      |
| 97-53-0                 | 0.78          | 29           | 4.76                    | -6.08       | 119        | 5.86 ± 1.65       | 0.87 ± 1.32      |
| 92-61-5                 | 0.73          | 37           | 3.80                    | -6.83       | 34         | 37.60 ± 6.53      | 19.03 ± 1.72     |
| 5728-52-9               | 0.72          | 39           | 3.40                    | -5.83       | 159        | 21.49 ± 2.76      | 7.04 ± 3.66      |
| 5104-49-4               | 0.70          | 41           | 2.89                    | -6.48       | 68         | 12.09 ± 1.68      | 8.60 ± 0.99      |
| 25812-30-0              | 0.69          | 42           | 2.78                    | -5.28       | 243        | 17.52 ± 1.59      | 9.27 ± 4.97      |
| 1197-18-8               | 0.69          | 46           | 4.40                    | -6.35       | 82         | 8.42 ± 3.63       | 6.79 ± 3.05      |
| 100643-71-8             | 0.68          | 48           | 2.18                    | -6.15       | 113        | 28.20 ± 0.40      | 10.33 ± 1.13     |
| 42200-33-9              | 0.67          | 52           | 2.16                    | -5.53       | 203        | 19.97 ± 1.48      | 14.12 ± 2.50     |
| 50-91-9                 | 0.63          | 62           | 2.57                    | -5.81       | 167        | 17.67 ± 2.04      | 8.81 ± 3.03      |
| 138982-67-9             | 0.58          | 75           | 1.41                    | -5.78       | 168        | 23.59 ± 1.94      | 9.57 ± 1.87      |
| 51-30-9                 | 0.57          | 81           | 2.69                    | -5.97       | 135        | 18.45 ± 1.11      | 12.43 ± 0.46     |
| 73-22-3                 | 0.57          | 82           | 2.79                    | -6.36       | 81         | 4.58 ± 2.39       | 2.58 ± 1.06      |
| 95-25-0                 | 0.55          | 88           | 3.25                    | -6.61       | 52         | 13.60 ± 1.37      | 3.68 ± 0.01      |
| 532-03-6                | 0.53          | 97           | 2.21                    | -5.33       | 234        | 12.64 ± 0.22      | 2.09 ± 1.07      |
| 738-70-5                | 0.50          | 107          | 1.73                    | -6.07       | 124        | 30.71 ± 0.60      | 10.00 ± 2.82     |
| 637-07-0                | 0.49          | 112          | 2.02                    | -6.57       | 56         | 6.48 ± 1.09       | 3.02 ± 1.82      |
| 93106-60-6              | 0.46          | 133          | 1.27                    | -7.00       | 21         | 2.17 ± 1.63       | -3.51 ± 2.15     |
| 121-33-5                | 0.44          | 144          | 2.89                    | -6.43       | 74         | -3.99 ± 1.04      | -13.90 ± 2.51    |
| 723-46-6                | 0.40          | 161          | 1.58                    | -5.21       | 252        | 17.73 ± 1.73      | 5.35 ± 1.34      |
| 75706-12-6              | 0.37          | 169          | 1.38                    | -6.33       | 84         | -15.13 ± 1.76     | -20.16 ± 1.60    |
| 22199-08-2 <sup>c</sup> | 0.37          | 171          | 1.48                    | -5.13       | 264        | 6.15 ± 1.49       | 2.01 ± 0.95      |

<sup>a</sup> Ligand efficiency was calculated as LE = BRD4LGR score/molecular weight\*1000.

<sup>b</sup> Benzyl alcohol is used as a bacteriostatic preservative at low concentration in intravenous medications, which might be not safe at higher dose.

<sup>c</sup> Silver sulfadiazine is only for external use, which might be not safe for internal use.

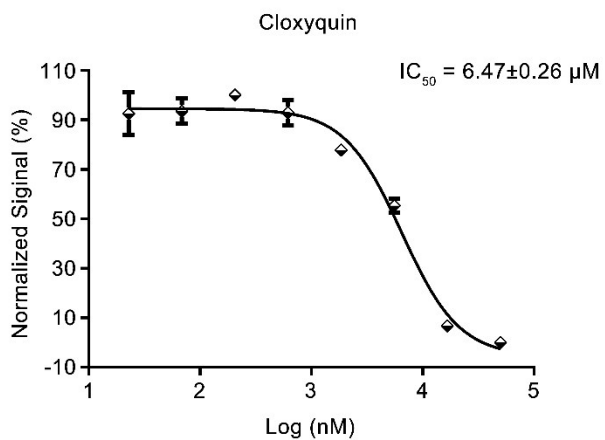

**Figure S1.** Dose-response behaviors of cloxyquin.

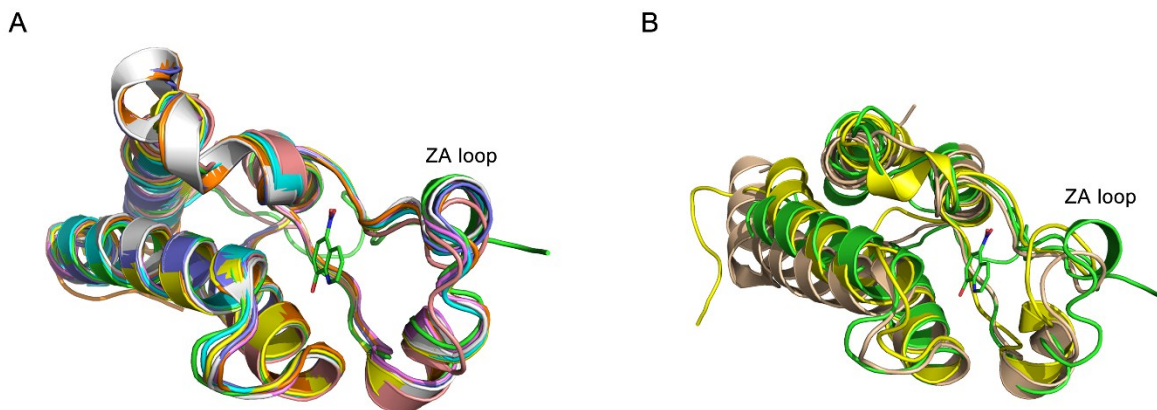

**Figure S2.** (A) Crystal structures of BET family (PDB IDs: 4ALG, salmon, 2DVV, slate, 3S91, yellow, 3S92, violent, 2WP1, orange, 2WP2, cyan, 2YEM, white) aligned to the complex of BRD4\_BD1-nitroxoline(green). (B) Crystal structures of BRD7 (PDB ID: 2I7K, yellow) and BRD9 (PDB ID: 4Z6H, wheat) aligned to the complex of BRD4\_BD1-nitroxoline(green).

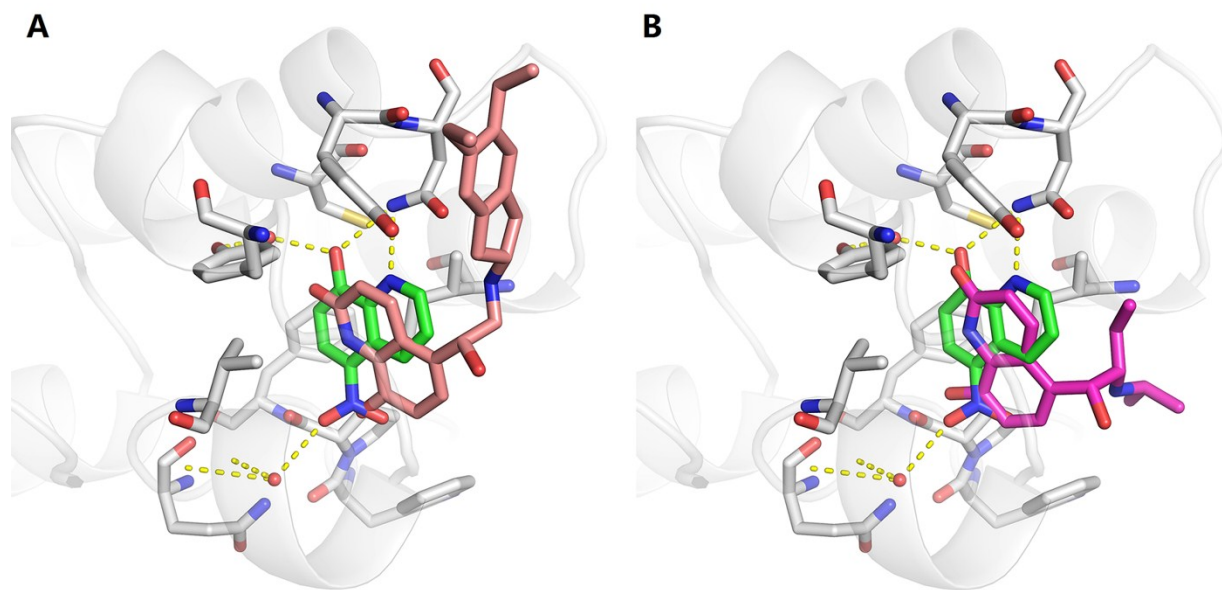

**Figure S3.** Predicted binding patterns of indacaterol (A) and procaterol (B), together with nitroxoline for comparison. nitroxoline was colored in green.

**4. Table S2.** Diffraction data statistics.

|                    |                              |
|--------------------|------------------------------|
| Dataset            | Nitroxoline                  |
| Wavelength         | 0.9785                       |
| Resolution range   | 40.51 - 1.912 (1.98 - 1.912) |
| Space group        | P 21 21 21                   |
| Unit cell          | 32.892 47.298 78.5 90 90 90  |
| Total reflections  | 127742 (12905)               |
| Unique reflections | 9973 (983)                   |
| Multiplicity       | 12.8 (13.1)                  |
| Completeness (%)   | 1.00 (1.00)                  |

|                                |                  |
|--------------------------------|------------------|
| Mean I/sigma(I)                | 36.87 (15.56)    |
| Wilson B-factor                | 23.86            |
| R-merge                        | 0.04772 (0.1376) |
| R-meas                         | 0.04981 (0.1433) |
| CC1/2                          | 0.999 (0.998)    |
| CC*                            | 1 (0.999)        |
| Reflections used in refinement | 9966 (982)       |
| Reflections used for R-free    | 997 (99)         |
| R-work                         | 0.1824 (0.2032)  |
| R-free                         | 0.2252 (0.2669)  |
| CC(work)                       | 0.963 (0.963)    |
| CC(free)                       | 0.959 (0.880)    |
| Number of non-hydrogen atoms   | 1149             |
| macromolecules                 | 1037             |
| ligands                        | 14               |
| Protein residues               | 125              |
| RMS(bonds)                     | 0.006            |
| RMS(angles)                    | 0.8              |
| Ramachandran favored (%)       | 99               |
| Ramachandran allowed (%)       | 0.82             |
| Ramachandran outliers (%)      | 0                |
| Rotamer outliers (%)           | 0                |
| Clashscore                     | 2.39             |
| Average B-factor               | 29.07            |
| macromolecules                 | 28.44            |
| ligands                        | 36.11            |

---

|         |       |
|---------|-------|
| solvent | 34.77 |
|---------|-------|
